# Supplementary material for: New properties in old systems: cooperative electric order in ferrocene and ammonia-borane
Source: Royal Society of Chemistry journal article supplement (doi:10.1039/c5ra12506e), 2015-01-01
Supplement: c5ra12506e1.pdf [file c5ra12506e1.pdf]

## ELECTRONIC SUPPLEMENTARY INFORMATION

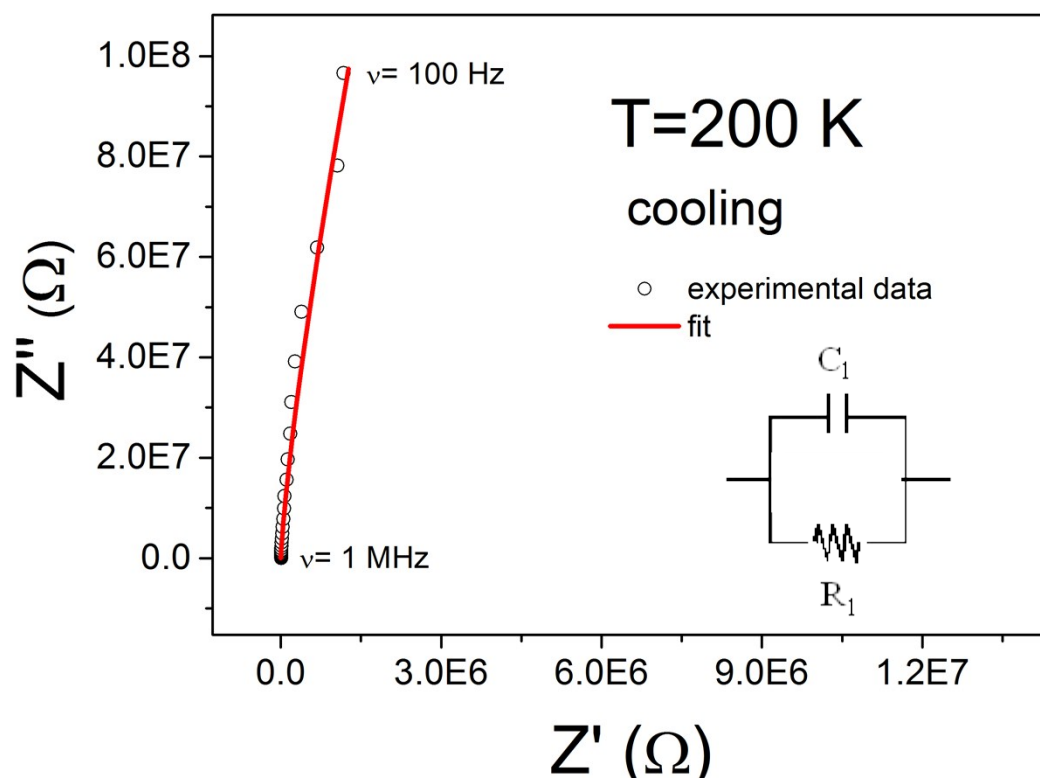

Figura S1.- Typical impedance complex plane of ferrocene and its corresponding fit representative of the temperatures around the transition and below.

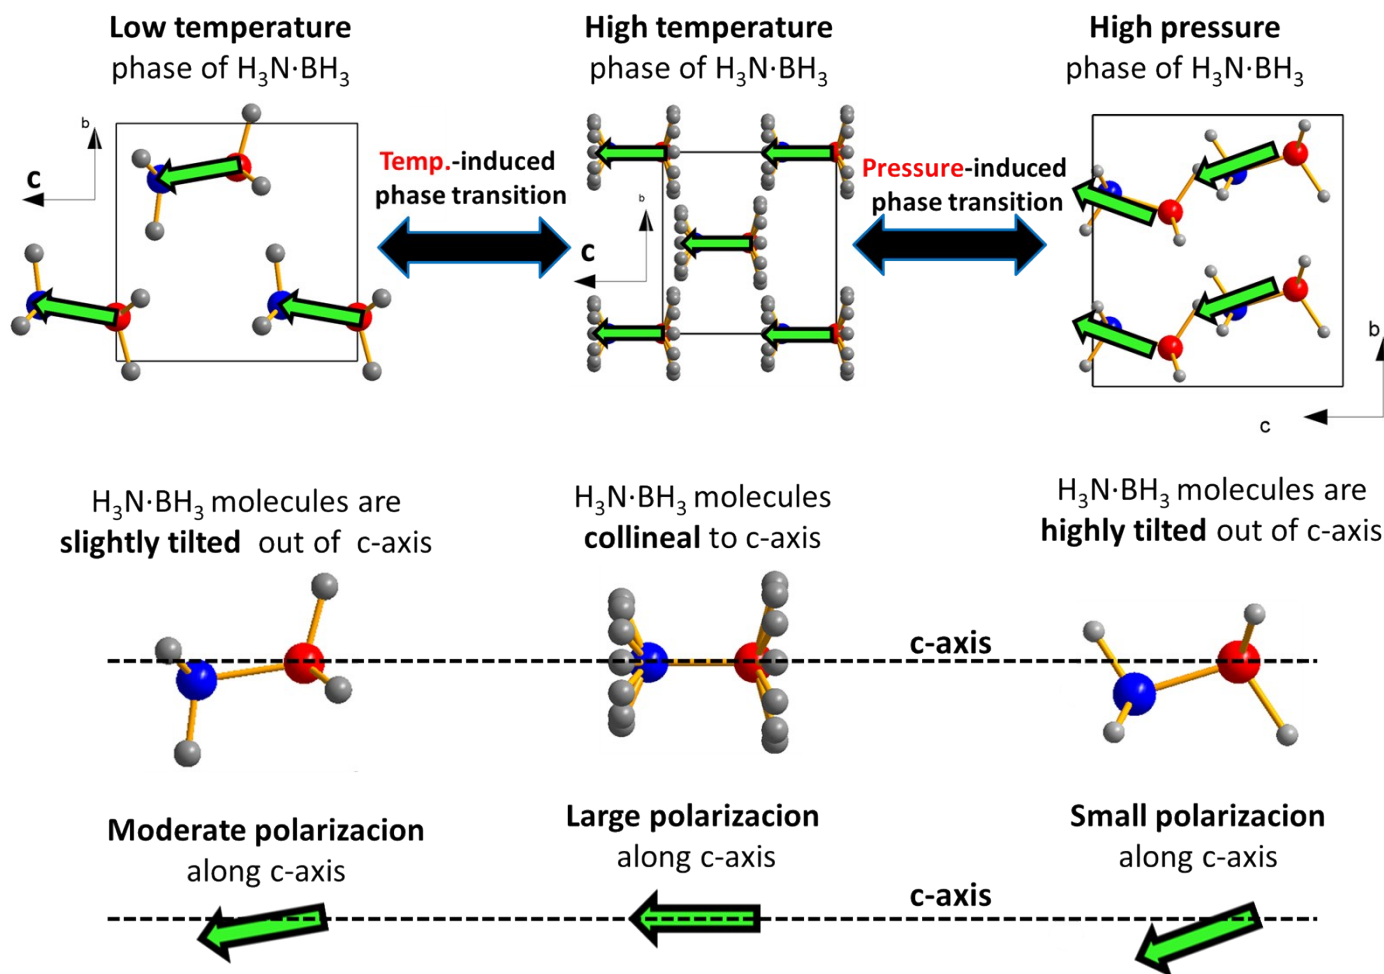

**Figure S2.** Scheme of phase transitions induced by temperature and pressure on ammonia-borane crystals. Also, we show the arrangement of ammonia-borane molecules and associated dipole moments along the c-axis.
